# Supplementary material for: Novel one-pot synthesis and sensitisation of new BiOCl–Bi2S3 nanostructures from DES medium displaying high photocatalytic activity
Source: Royal Society of Chemistry journal article supplement (doi:10.1039/c6ra14474h), 2016-01-01
Supplement: c6ra14474h1.pdf [file c6ra14474h1.pdf]

**Novel one-pot synthesis and sensitisation of new BiOCl-Bi<sub>2</sub>S<sub>3</sub> nanostructures from DES medium displaying high photocatalytic activity**

V. C. Ferreira<sup>a</sup>, M. C. Neves<sup>b</sup>, A. R. Hillman<sup>c</sup> and O. C. Monteiro<sup>a</sup>

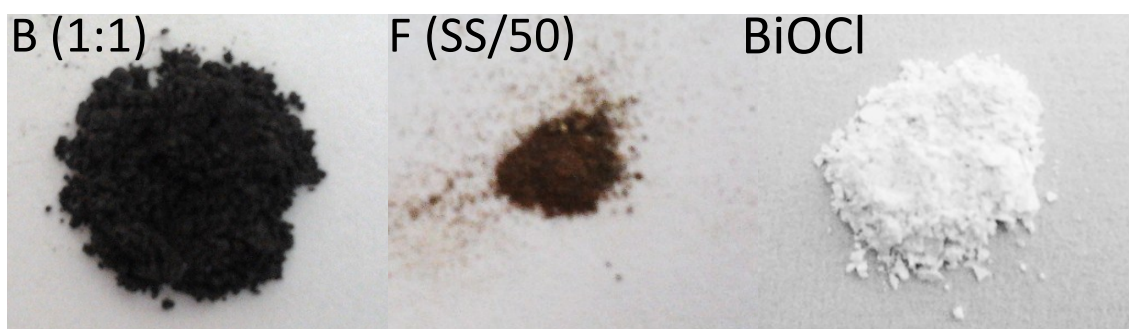

Figure S1. Picture of samples B (1:1), F (SS/50) and pure BiOCl.

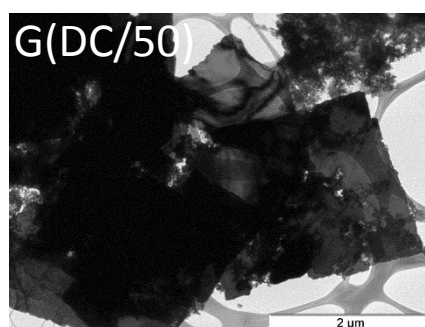

Figure S2. TEM images of sample G (DC/50).

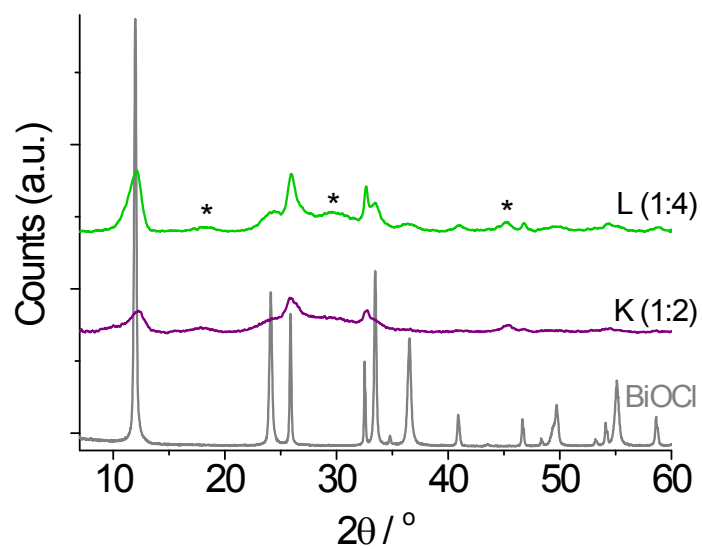

Figure S3. XRD patterns of samples K and L prepared from dry chemicals in the proportion: (1:2) and (1:4), respectively, and comparison with pure BiOCl.

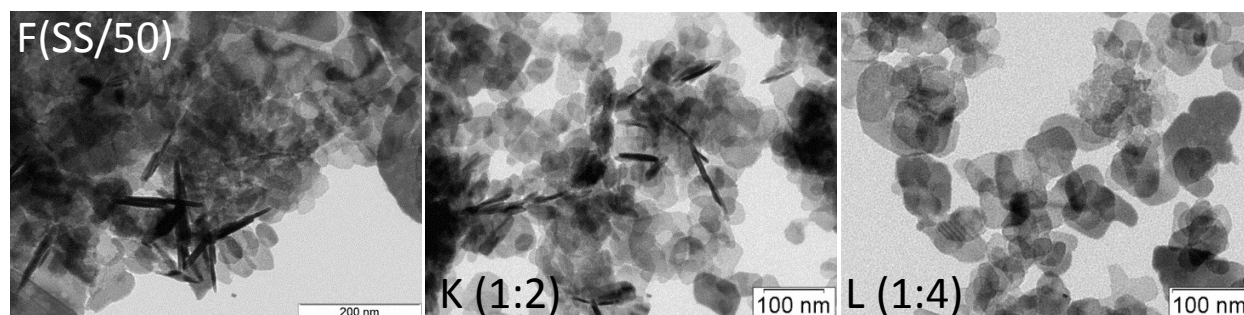

Figure S4 – TEM images of samples F(SS/50), K (1:2) and L (1:4).

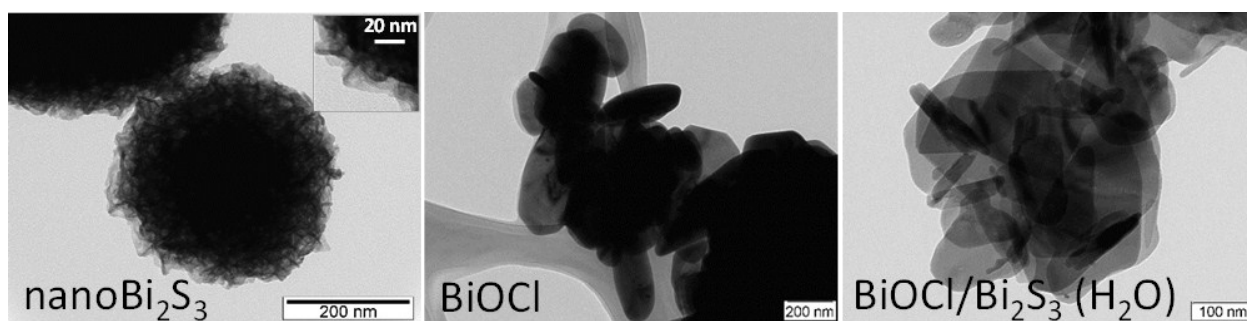

Figure S5 – TEM images of nanoBi<sub>2</sub>S<sub>3</sub>, pure BiOCl and BiOCl-Bi<sub>2</sub>S<sub>3</sub> prepared in H<sub>2</sub>O.

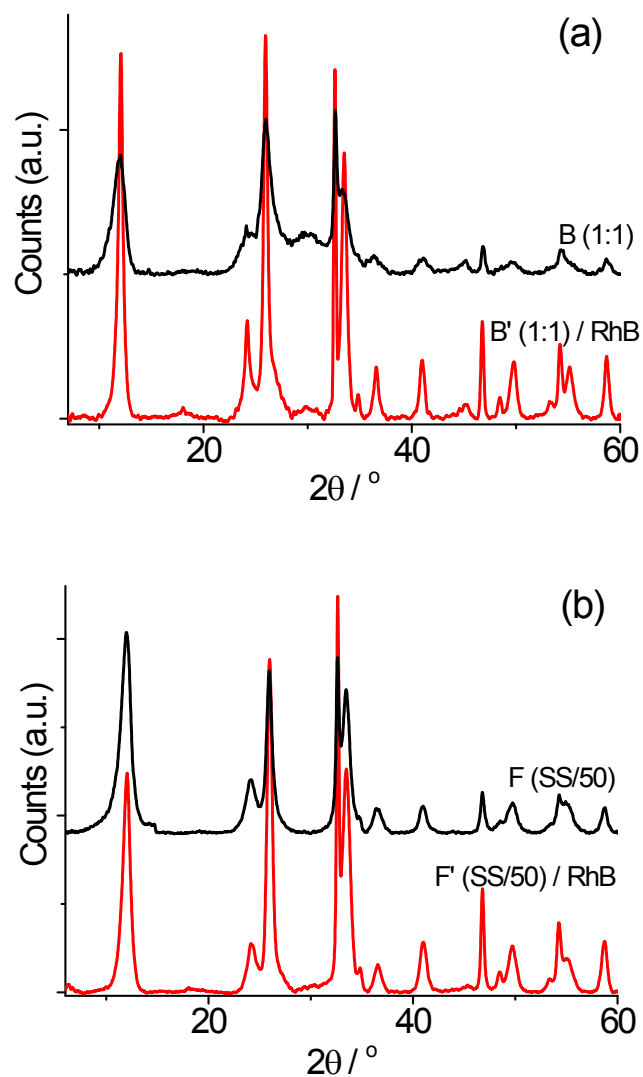

Figure S6. XRD patterns of samples B and F, before (B (1:1) and F (SS/50)) and after (B' (1:1)/RhB and F' (SS/50)/RhB) degradation of RhB under UV-visible light.
